# Supplementary material for: Coordination of the biliverdin D-ring in bacteriophytochromes
Source: Royal Society of Chemistry journal article supplement (doi:10.1039/c8cp01696h), 2018-01-01
Supplement: c8cp01696h1.pdf [file c8cp01696h1.pdf]

Supporting Information

# Coordination of the Biliverdin D-ring in Bacteriophytochromes

Nils Lenngren,<sup>a‡</sup> Petra Edlund,<sup>b‡</sup> Heikki Takala,<sup>a;‡</sup> Brigitte Stucki-Buchli,<sup>a</sup> Jessica Rumfeldt,<sup>a</sup> Ivan Peshev,<sup>a</sup> Heikki Häkkinen,<sup>a</sup> Sebastian Westenhoff,<sup>\*b</sup> and Janne A. Ihalainen<sup>\*a</sup>

‡ Contributed equally

a Department of Biological and Environmental Sciences, Nanoscience Center, University of Jyväskylä, PO Box 35, FI-40014 University of Jyväskylä, Finland.

b Department of Chemistry and Molecular Biology, Biochemistry and Biophysics, University of Gothenburg, PO Box 462, SE-40530 Gothenburg, Sweden.

c University of Helsinki, Faculty of Medicine, Anatomy, PO Box 63, FI-00014 University of Helsinki, Finland.

\* corresponding authors: westenho@chem.gu.se, janne.ihalainen@jyu.fi

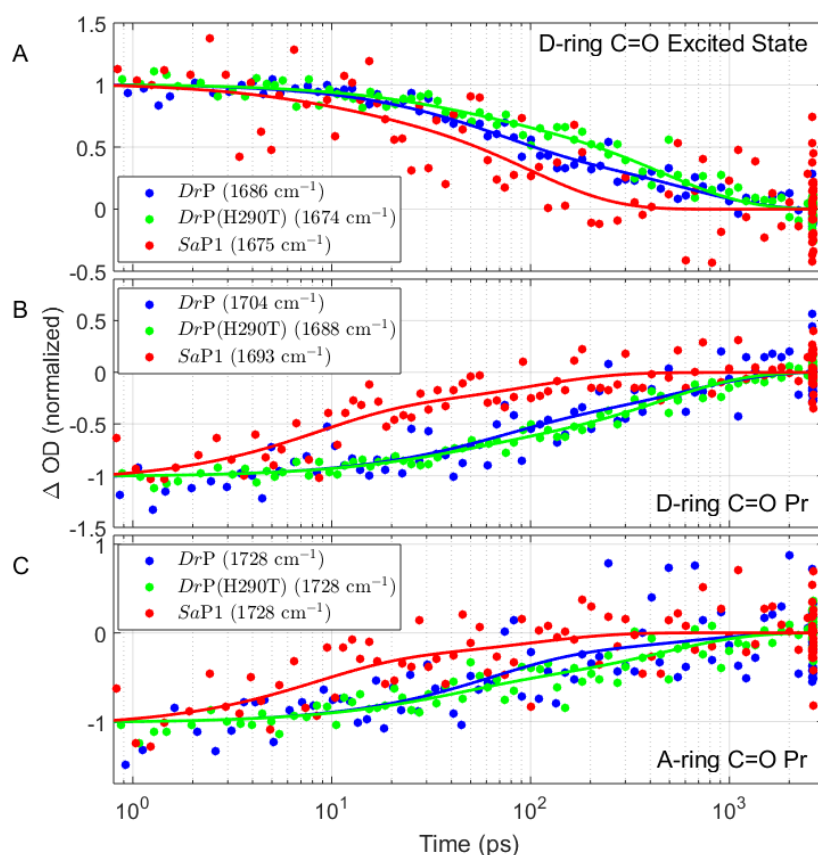

**Figure SI 1**, Normalized time traces of the IR signals of the carbonyl groups of the biliverdin at the excited state absorption of the D-ring (A), at the bleach of the D-ring (B), and at the bleach of the A-ring (C), of the *DrP*<sub>PSM</sub> (blue), *DrP*(H290T)<sub>PSM</sub> (green), and *SaP1*<sub>PSM</sub> (red) samples. The lines are the global analysis fits. The data shows that the excited state decay is faster for *SaP1*<sub>PSM</sub> than for *DrP*<sub>PSM</sub>. On the other hand, *DrP*(H290T)<sub>PSM</sub> is slightly slower than *DrP*<sub>PSM</sub>.

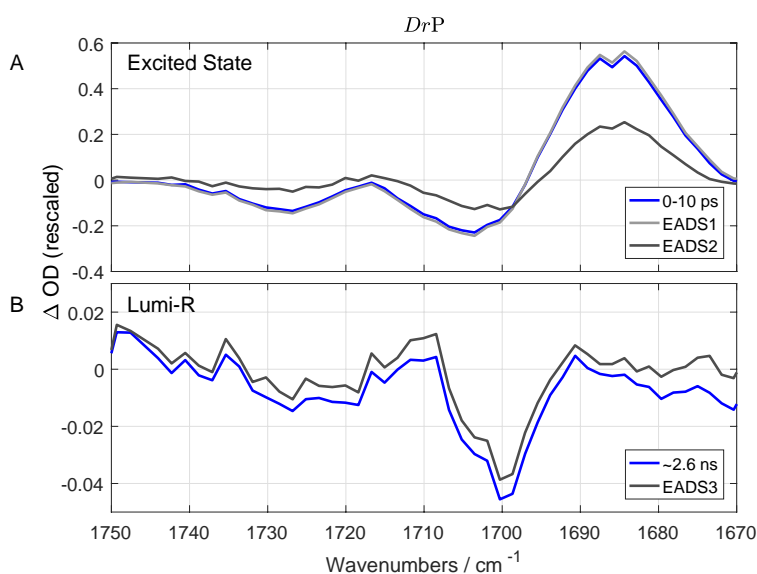

**Figure SI 2,** Comparison of the Evolution associated difference spectra and the raw spectral data at the early time points (A) and at the late time-points (B) of *DrP*<sub>PSM</sub>. The 2.6 ns spectral information is obtained by integrating signals from 30 different time-points within a distribution of 5 ps around the 2.6 ns. The detected spectrum at 0-10 ps overlays very well with the EADS and the spectral difference between EADS1 and EADS2 pinpoints the need of introduction of a second time-component to the analysis.

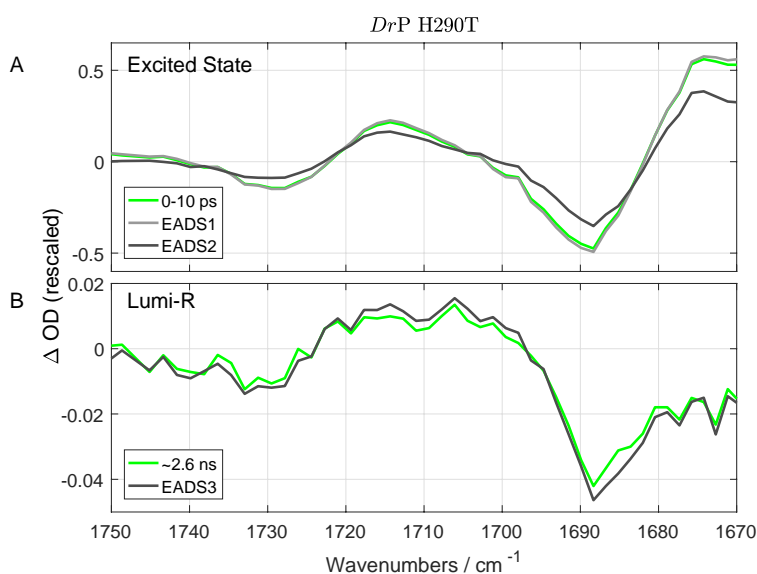

**Figure SI 3,** Comparison of the Evolution associated difference spectra and the raw spectral data at the early time points (A) and at the late time-points (B) of *DrP(H290T)*<sub>PSM</sub>. The 2.6 ns spectral information is obtained by integrating signals from 30 different time-points within a distribution of 5 ps around the 2.6 ns. The detected spectrum at 0-10 ps overlays very well with the EADS and the spectral difference between EADS1 and EADS2 pinpoints the need of introduction of a second time-component to the analysis.

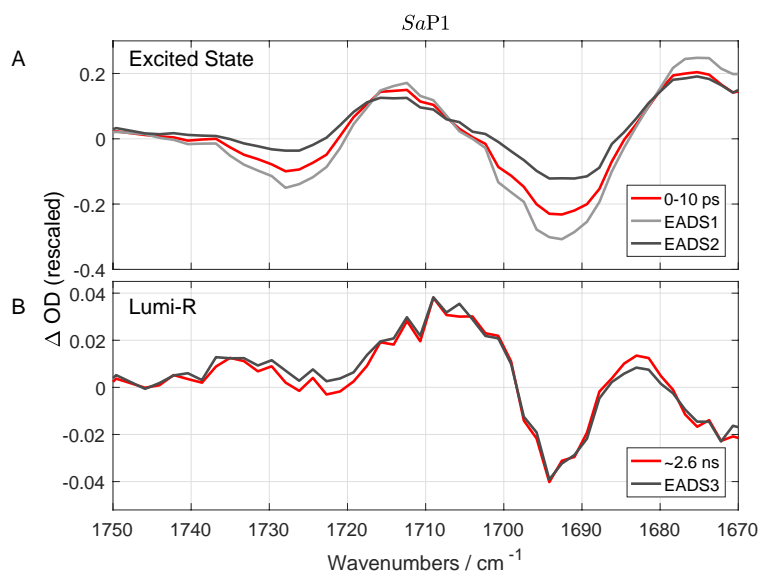

**Figure SI 4,** Comparison of the Evolution associated difference spectra (EADS) and the raw spectral data at the early time points (A) and at the late time-points (B) of SaP1<sub>PSM</sub>. The 2.6 ns spectral information is obtained by integrating signals from 30 different time-points within a distribution of 5 ps around the 2.6 ns. The spectral shape, detected at 0-10 ps, follows the spectral features of the EADS1. However, as the lifetime of the EADS1 is clearly shorter, the amplitude of the EADS1 is larger.

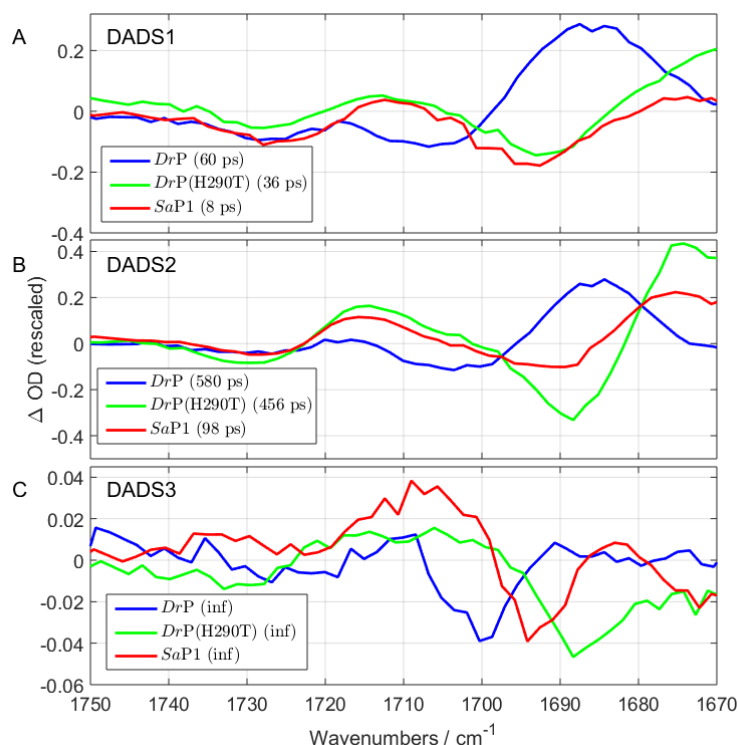

**Figure SI 5,** Decay-associated difference spectra (DADS) of  $DrP_{PSM}$ ,  $DrP(H290T)_{PSM}$ , and  $SaP1_{PSM}$ . The DADS were obtained by the same global analysis as the EADS in Fig. 5. Whereas the EADS assume a sequential model, the DADS are the result of a model with components decaying in parallel. The associated time constants are therefore the same.

**Table SI 1,** Decay times ( $\tau$ ) and amplitudes of the DADS (A) of three components in the global analysis.

|                    | $DrP_{PSM}$       |      | $DrP(H290T)_{PSM}$ |      | $SaP1_{PSM}$      |      |
|--------------------|-------------------|------|--------------------|------|-------------------|------|
| Component          | $\tau$            | A*   | $\tau$             | A*   | $\tau$            | A*   |
| 1                  | 60 ps             | 0.57 | 36 ps              | 0.30 | 8 ps              | 0.41 |
| 2                  | 580 ps            | 0.39 | 456 ps             | 0.63 | 98 ps             | 0.49 |
| 3                  | non<br>decaying** | 0.05 | non<br>decaying**  | 0.07 | non<br>decaying** | 0.10 |
| $\tau_{ave}^{***}$ | 260 ps            |      | 298 ps             |      | 51 ps             |      |

\* A was estimated by integrating the DADS over the detected spectral range, the confidence range is 20%.

\*\* The lifetime of the non-decaying component  $\tau_3$  was fixed to 100 ns.

\*\*\*  $\tau_{ave}$  is computed as  $\tau_1 \cdot A_1 + \tau_2 \cdot A_2$
